# Supplementary material for: p-Xylylenediamine derived ligands as flexible connectors in the design of porous coordination polymers
Source: Royal Society of Chemistry journal article supplement (doi:10.1039/c9ce00371a), 2019-01-01
Supplement: c9ce00371a1.pdf [file c9ce00371a1.pdf]

## Supporting Information

### p-Xylylenediamine derived ligands as flexible connectors in the design of porous coordination polymers

Adrian J. Emerson, Gregory P. Knowles, Alan L. Chaffee, Stuart R. Batten\* and David R. Turner\*

School of Chemistry, Monash University, Clayton, VIC 3800, Australia

E-mail: david.turner@monash.edu, stuart.batten@monash.edu

Fax: +61 3 9905 4597; Tel: +61 3 9905 6293

## Table of Contents

|            |                                                                                                                                                                                       |
|------------|---------------------------------------------------------------------------------------------------------------------------------------------------------------------------------------|
| S1.        | Special Crystallographic Refinement Information                                                                                                                                       |
| S2.        | Powder X-Ray Diffraction                                                                                                                                                              |
| S3.        | Thermogravimetric Analysis                                                                                                                                                            |
| S4.        | Gas Adsorption Data                                                                                                                                                                   |
| S5.        | Partial Pressure vs. Quantity Adsorbed                                                                                                                                                |
| S6.        | Catenane Motif Present Within poly-[Co <sub>4</sub> ( <b>P4pxy</b> ) <sub>2</sub> (DMF) <sub>2</sub> (μ-OH <sub>2</sub> ) <sub>2</sub> (OH <sub>2</sub> ) <sub>2</sub> ] ( <b>5</b> ) |
| References |                                                                                                                                                                                       |

## S1. Special Crystallographic Refinement Information

### (H<sub>6</sub>P<sub>4</sub>pxy)Cl<sub>2</sub>

All carboxylic acid and ammonium hydrogen atoms were located from the Fourier difference map and were refined to standard bond lengths using SHELX DFIX commands. Five reflections with large error/esd values were omitted, all of which were of low angle and likely obstructed by the beam stop.

### [Cu<sub>4</sub>(M<sub>4</sub>pxy)<sub>2</sub>(DMF)<sub>2</sub>(OH<sub>2</sub>)] (1)

The crystal was weakly diffracting, giving low intensity data and a large R<sub>int</sub> value.

The M<sub>4</sub>pxy ligand is disordered over two positions. A series of SADI, SIMU and ISOR restraints were used to help model the disorder. The disorder was only able to be sensibly modelled for half of the M<sub>4</sub>pxy ligand present in the asymmetric unit.

The crystallographic inversion centre lies at the centre of the cage complex, with the residual electron density within the cavity modelled as a disordered aqua ligand, split equally across both positions. There is insufficient volume within the cavity for any other sensible ligands to be modelled across these positions. The hydrogen atoms on the O10 aqua ligand were placed in calculated positions and refined with AFIX restraints.

### Poly-[Cu<sub>2</sub>(M<sub>4</sub>pxy)(OH<sub>2</sub>)<sub>2</sub>] (2)

Crystals did not diffract past 0.9 Å and this resolution was used as a cut-off value during refinement. The crystals also suffered from radiation damage from use of the synchrotron source. The data has slightly low completeness and a large R<sub>int</sub> (and subsequently R<sub>1</sub>) value as a result of this poor diffraction and radiation damage.

Two SHELX DFIX commands and one DANG command were used in the refinement of the hydrogen atoms on the aqua ligand (H5A and H5B).

There were significant regions of disordered electron density detected in the residual Fourier difference map after the refinement of all framework atoms. None of these lattice solvent molecules could be reasonably modelled, and the remaining electron density had its contribution to the diffraction data accounted for with the SQUEEZE routine within PLATON.<sup>1</sup> Analysis of the voids from SQUEEZE results in a total electron count of 289 e<sup>-</sup> within the voids per unit cell, with a void volume of 1504 Å<sup>3</sup>. An estimation of the nature of the solvent was unable to be determined as a pure phase of **2** was not isolated, and thus microanalysis and thermogravimetric analysis data was not obtained.

Poly-[Cu<sub>2</sub>(**P<sub>4</sub>pxy**)(DMF)(OH<sub>2</sub>)]·2DMF·3H<sub>2</sub>O (**3·2DMF·3H<sub>2</sub>O**)

The hydrogen atoms on the aqua ligand (O10) were located from the Fourier difference map and were refined using SHELX DFIX commands. A restraint was also used to model this ligand in a chemically appropriate orientation.

ISOR commands were used on the carbon and nitrogen atoms of the DMF ligand in order to model the ellipsoids more sensibly. There are some weak residual electron density peaks in the Fourier map nearby indicating possible disorder however these small peaks could not be modelled satisfactorily, and the large displacement parameters accurately model the situation.

There were significant regions of disordered electron density detected in the residual Fourier difference map after the refinement of all framework atoms. Only one lattice DMF molecule could be reasonably modelled, and the remaining electron density had its contribution to the diffraction data accounted for with the SQUEEZE routine within PLATON.<sup>1</sup> Analysis of the voids from SQUEEZE results in a total electron count of 835 e<sup>-</sup> within the voids per unit cell, with a void volume of 3786 Å<sup>3</sup>. These values equate to 104 e<sup>-</sup> in 473 Å<sup>3</sup> per asymmetric unit (containing one formula unit). This electron density is accounted for as one DMF and three waters per ASU (8 DMF and 24 H<sub>2</sub>O molecules per cell, total electron count of 560 e<sup>-</sup>, 1152 Å<sup>3</sup> using 18 Å<sup>3</sup> per non-H atom).

The total amount of solvent (ligands, refined DMF and SQUEEZED) also reasonably matches the 17 % mass loss observed in TGA up to 215 °C (Fig. S9), with a calculated mass of 19 % (3 DMF and 4 H<sub>2</sub>O molecules per [Cu<sub>2</sub>(**P<sub>4</sub>pxy**)]), in addition to matching the elemental percentages found with microanalysis (see main text).

Poly-[Mn<sub>2</sub>(**P<sub>4</sub>pxy**)(DMA)<sub>2</sub>] (**4**)

ISOR commands were used on the carbon and nitrogen atoms of the DMA ligand in order to model the ellipsoids more reasonably. There are some residual electron density peaks on the Fourier map nearby indicating potential disorder of this ligand. Attempts to model were not satisfactory, thus the slightly large displacement parameters are a good model of this ligand.

Poly-[Co<sub>4</sub>(**P<sub>4</sub>pxy**)<sub>2</sub>(DMF)<sub>2</sub>(μ-OH<sub>2</sub>)<sub>2</sub>(OH<sub>2</sub>)<sub>2</sub>]·6DMF·4H<sub>2</sub>O (**5·6DMF·4H<sub>2</sub>O**)

The hydrogen atoms of the aqua ligands were located from the Fourier difference map and refined using SHELX DFIX restraints. DFIX and DANG restraints were also utilised on the aqua ligands to ensure chemically sensible orientations with respect to neighbouring groups.

The largest unassigned electron density peak on the Fourier map is located in the centre of the cobalt cluster and lies on a special position, and is likely an adsorption artefact from the data collection.

There were significant regions of disordered electron density detected in the residual Fourier difference map after the refinement of all framework atoms. Only one lattice DMF molecule could be reasonably modelled, and the remaining electron density had its contribution to the diffraction data accounted for with the SQUEEZE routine within PLATON.<sup>1</sup> Analysis of the voids from SQUEEZE results in a total electron count of 276 e<sup>-</sup> within the voids per unit cell, with a void volume of 880 Å<sup>3</sup>. These values equate to 138 e<sup>-</sup> in 441 Å<sup>3</sup> per asymmetric unit (containing one formula unit). This electron density is accounted for as 5.5 DMF (as one is modelled per asymmetric unit) and four waters per ASU

(11 DMF and 8 H<sub>2</sub>O molecules per cell, total electron count of 440 e<sup>-</sup>, 1134 Å<sup>3</sup> using 18 Å<sup>3</sup> per non-H atom).

The total amount of solvent (ligands, refined DMF and SQUEEZED) also reasonably matches the 22 % mass loss observed in TGA up to 210 °C (Fig. S11), with a calculated mass of 23 % (6 DMF and 6 H<sub>2</sub>O molecules per [Co<sub>4</sub>(**P<sub>4</sub>pxy**)<sub>2</sub>(DMF)<sub>2</sub>(μ-OH<sub>2</sub>)]), in addition to matching the elemental percentages found with microanalysis (see main text).

#### Poly-[Cd<sub>2</sub>(**P<sub>4</sub>pxy**)(OH<sub>2</sub>)<sub>2</sub>]-DMA·3H<sub>2</sub>O (**6-DMA·3H<sub>2</sub>O**)

Several low angle reflections, which had large error/esd values and are assumed to have been obstructed by the beam stop during data collection, were omitted. The two largest residual electron density peaks on the Fourier difference map are in close proximity to the cadmium cations, and are assumed to be adsorption artefacts.

The hydrogen atoms on the aqua ligands were placed in calculated positions and refined using SHELX DFIX commands. DFIX and DANG commands were also used to ensure chemically sensible orientations with respect to neighbouring groups in some instances.

There were significant regions of disordered electron density detected in the residual Fourier difference map after the refinement of all framework atoms. None of the lattice solvent molecules could be reasonably modelled, and the remaining electron density had its contribution to the diffraction data accounted for with the SQUEEZE routine within PLATON.<sup>1</sup> Analysis of the voids from SQUEEZE results in a total electron count of 254 e<sup>-</sup> within the voids per unit cell, with a void volume of 1648 Å<sup>3</sup>. These values equate to 64 e<sup>-</sup> in 412 Å<sup>3</sup> per asymmetric unit (containing one formula unit). This electron density is accounted for as one DMA and three waters per ASU (4 DMA and 12 H<sub>2</sub>O molecules per cell, total electron count of 312 e<sup>-</sup>, 864 Å<sup>3</sup> using 18 Å<sup>3</sup> per non-H atom).

The total amount of solvent (ligands and SQUEEZED) also reasonably matches the 16 % mass loss observed in TGA up to 250 °C (Fig. S12), with a calculated mass of 16 % (1 DMA and 5 H<sub>2</sub>O molecules per [Cd<sub>2</sub>(**P<sub>4</sub>pxy**)]), in addition to matching the elemental percentages found with microanalysis (see main text).

## S2. Powder X-Ray Diffraction

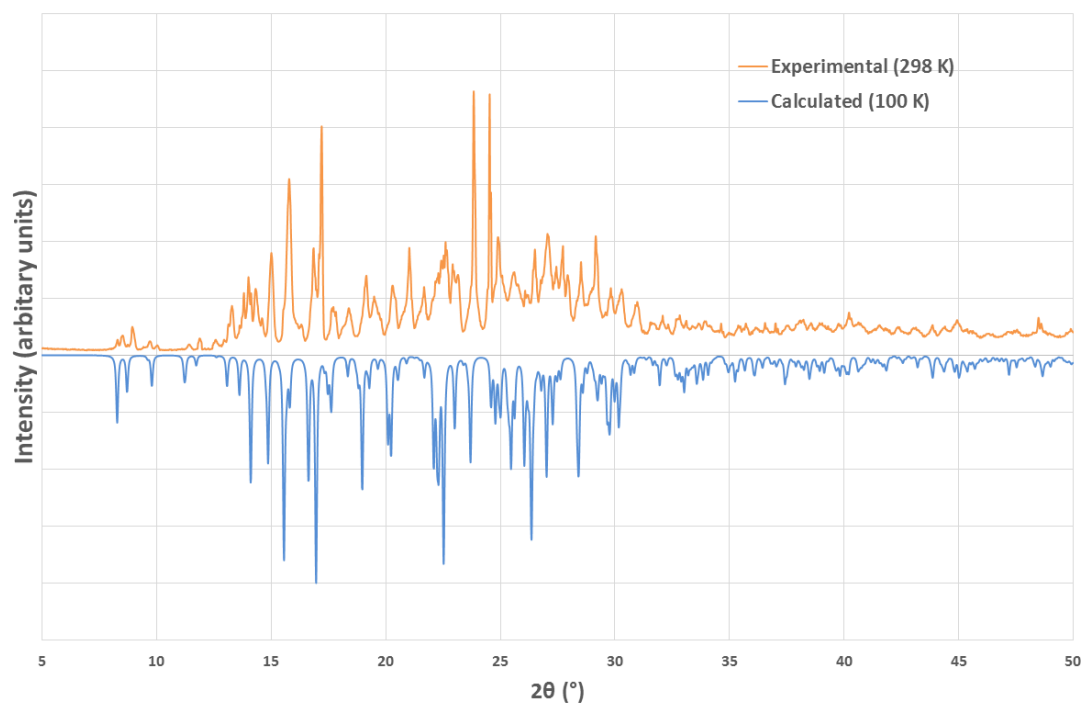

**Figure S1.** Bulk PXRD on a sample of  $(\text{H}_6\text{P}_4\text{pxy})\text{Cl}_2$ , with the calculated pattern from single crystal XRD shown inverted (blue), and the as synthesised experimental pattern shown positive (orange).

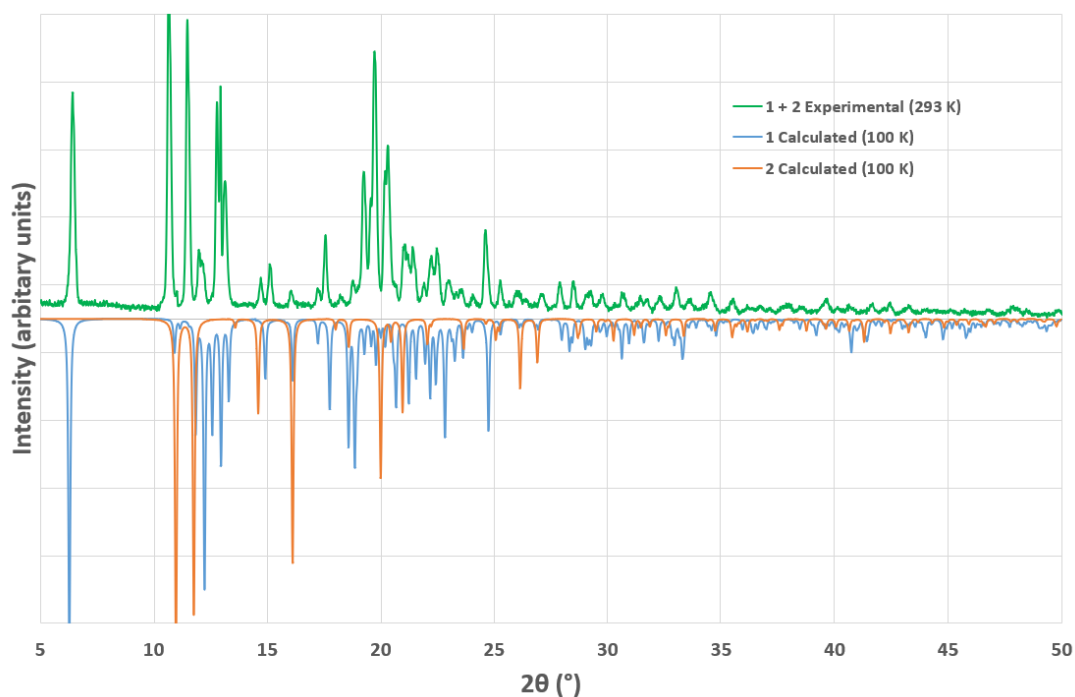

**Figure S2.** Bulk PXRD on a sample of **1** and **2**, with the calculated patterns from single crystal XRD of **1** and **2** shown inverted (blue and orange respectively), and the as synthesised experimental pattern shown positive (green).

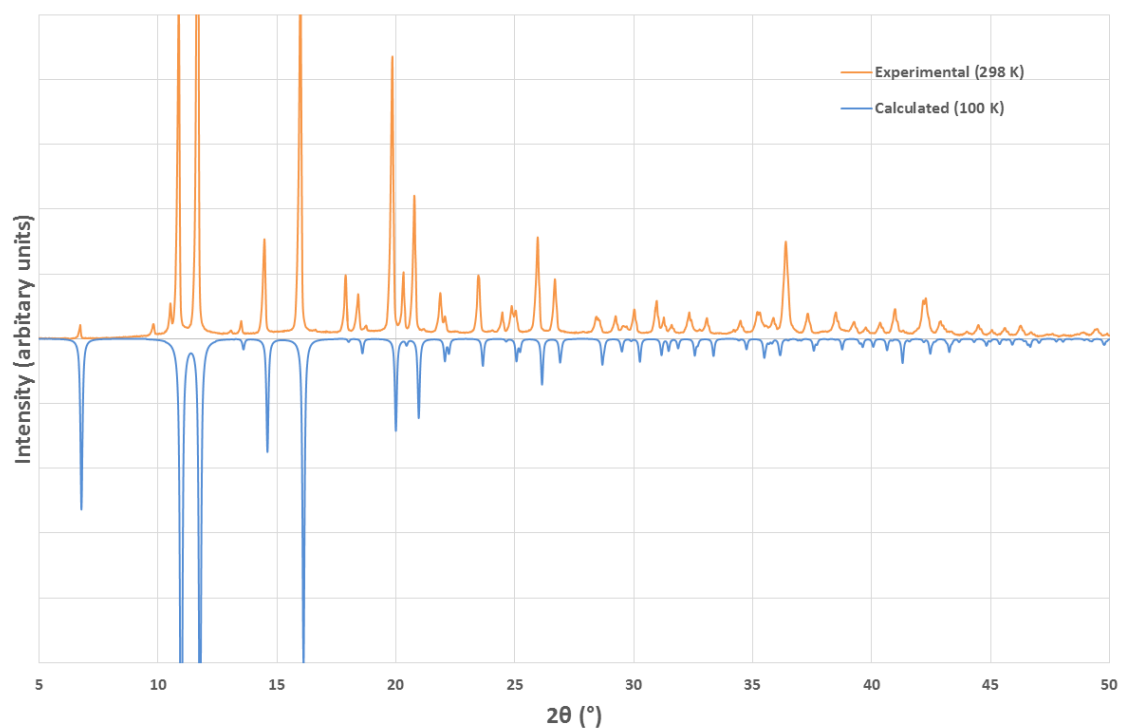

**Figure S3.** Bulk PXRD on a sample of **3**·2DMF·3H<sub>2</sub>O, with the calculated pattern from single crystal XRD shown inverted (blue), and the as synthesised experimental pattern shown positive (orange).

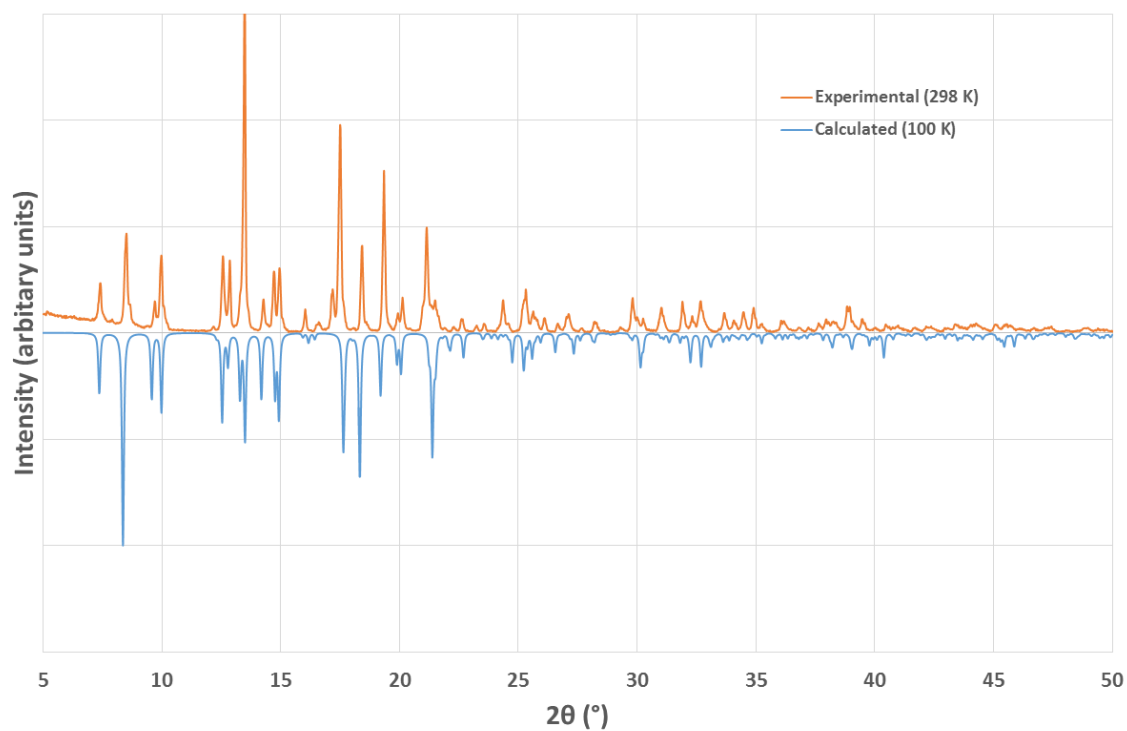

**Figure S4.** Bulk PXRD on a sample of **4**, with the calculated pattern from single crystal XRD shown inverted (blue), and the as synthesised experimental pattern shown positive (orange).

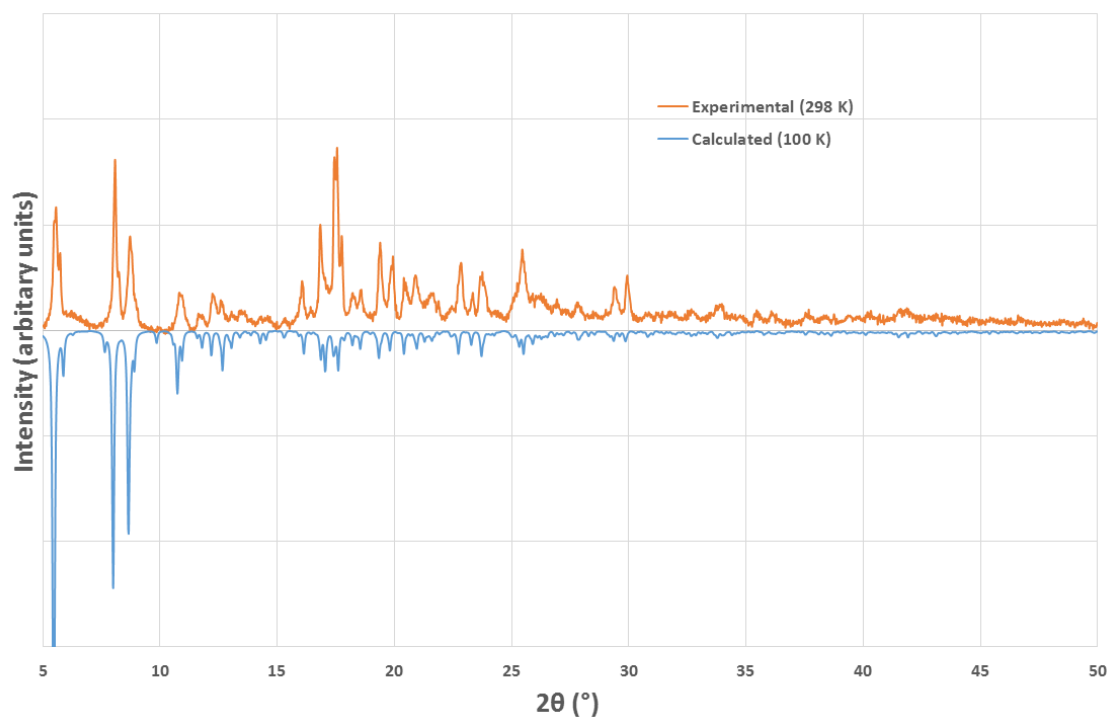

**Figure S5.** Bulk PXRD on a sample of **5·6DMF·4H<sub>2</sub>O**, with the calculated pattern from single crystal XRD shown inverted (blue), and the as synthesised experimental pattern shown positive (orange).

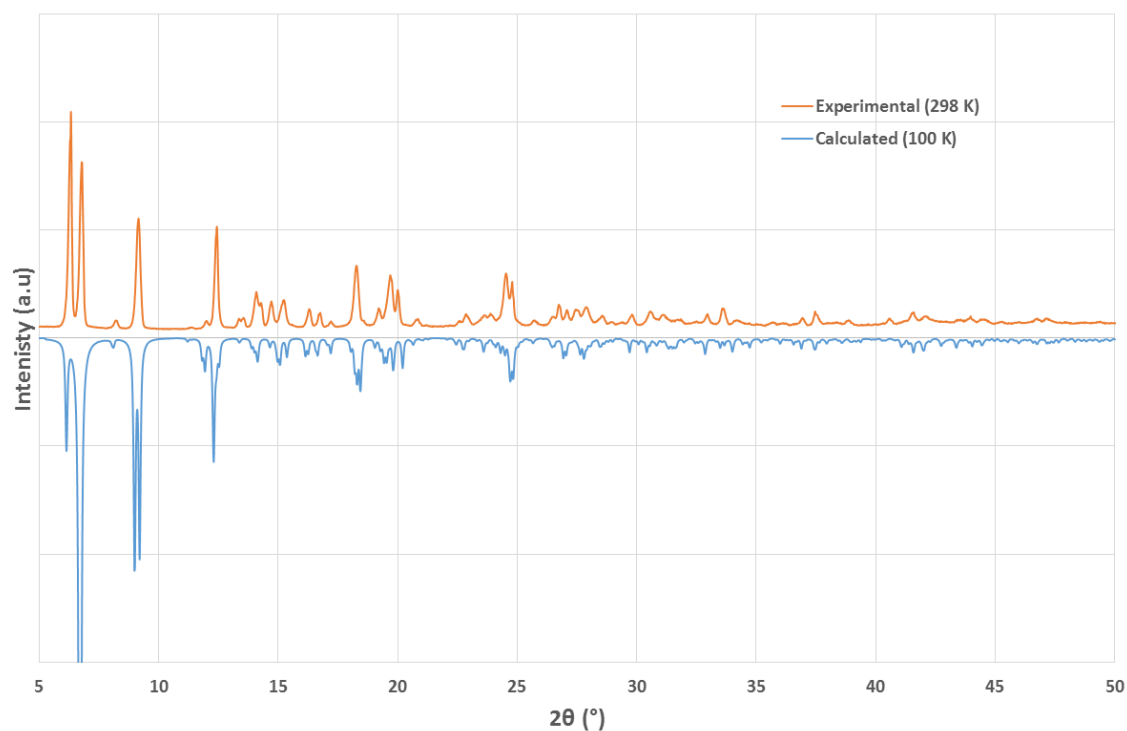

**Figure S6.** Bulk PXRD on a sample of **6·DMA·3H<sub>2</sub>O**, with the calculated pattern from single crystal XRD shown inverted (blue), and the as synthesised experimental pattern shown positive (orange).

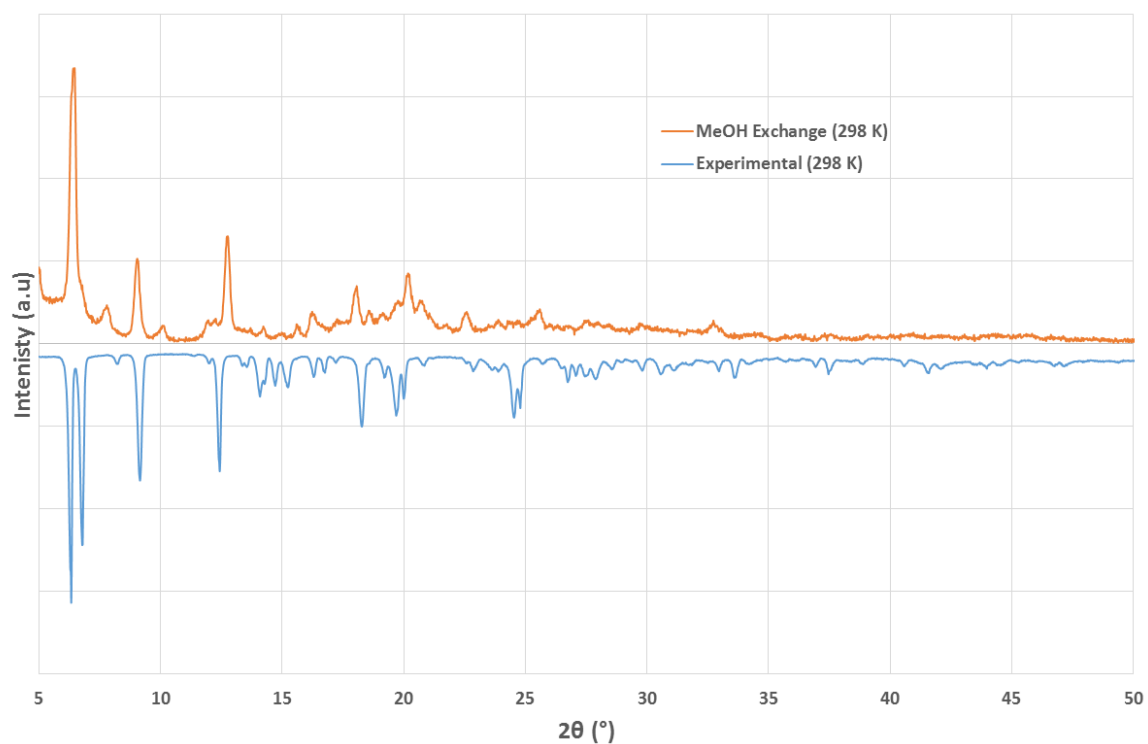

**Figure S7.** Bulk PXRD on a sample of **6-DMA·3H<sub>2</sub>O**, with the as synthesised experimental pattern shown inverted (blue), and the MeOH exchanged experimental pattern shown positive (orange).

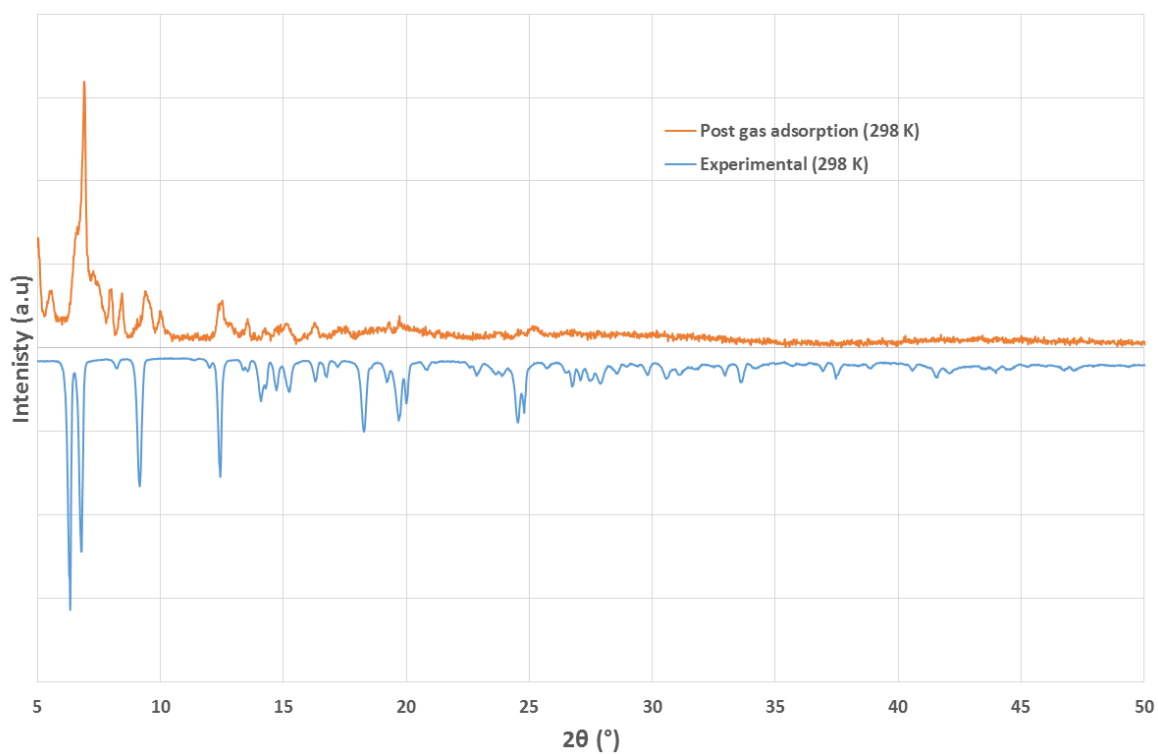

**Figure S8.** Bulk PXRD on a sample of **6-DMA·3H<sub>2</sub>O**, with the as synthesised experimental pattern shown inverted (blue), and the experimental pattern after the gas adsorption experiment shown positive (orange).

### S3. Thermogravimetric Analysis

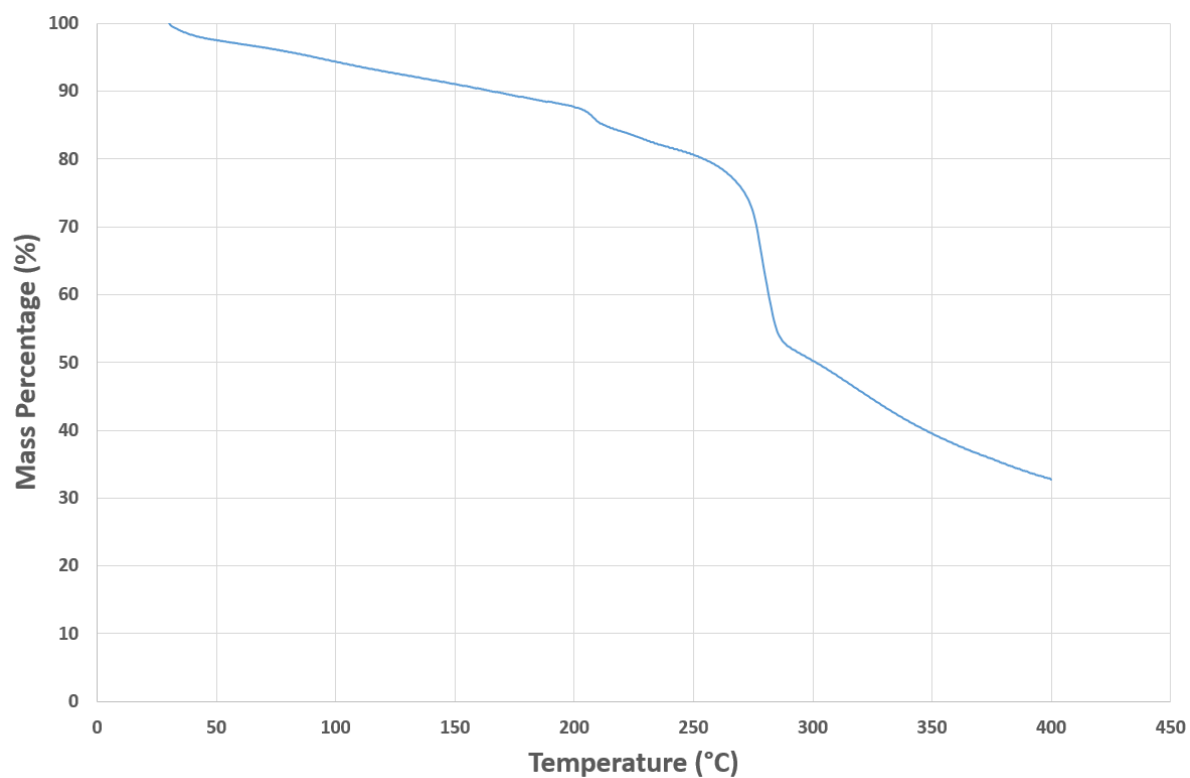

**Figure S9.** Thermogravimetric analysis of the as synthesised sample of **3·3DMF·3H<sub>2</sub>O**.

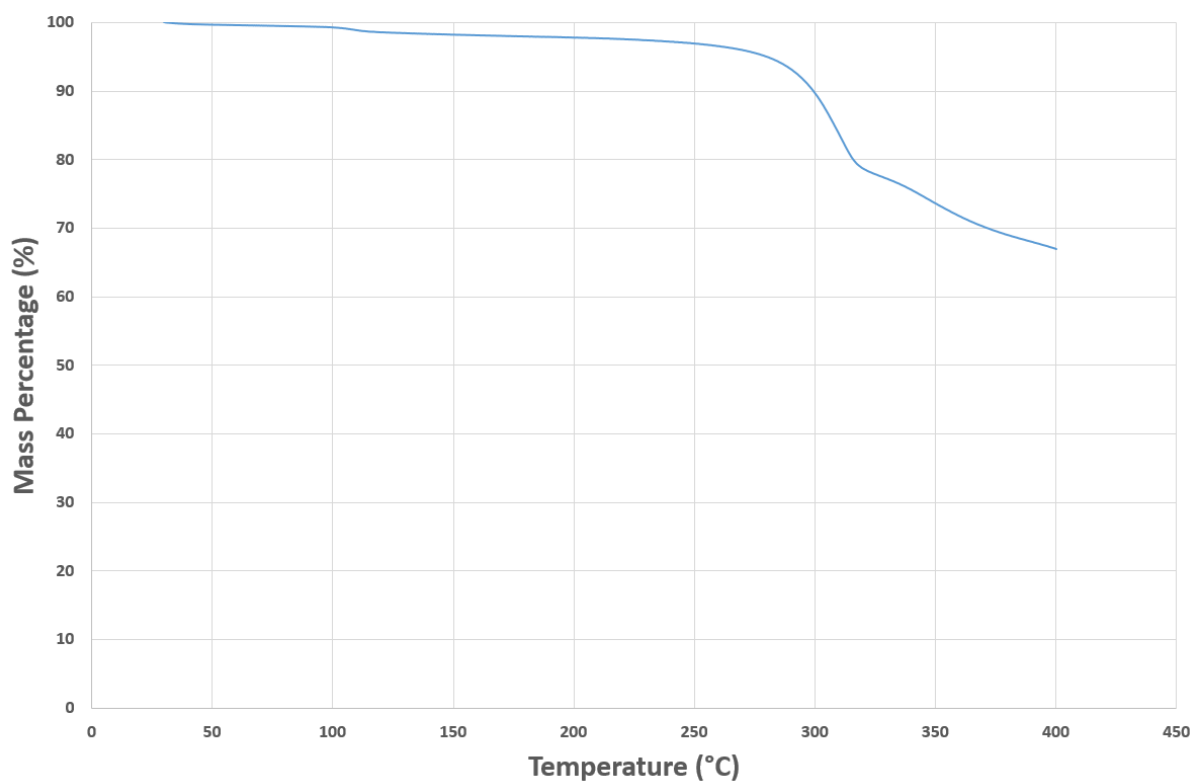

**Figure S10.** Thermogravimetric analysis of the as synthesised sample of **4**.

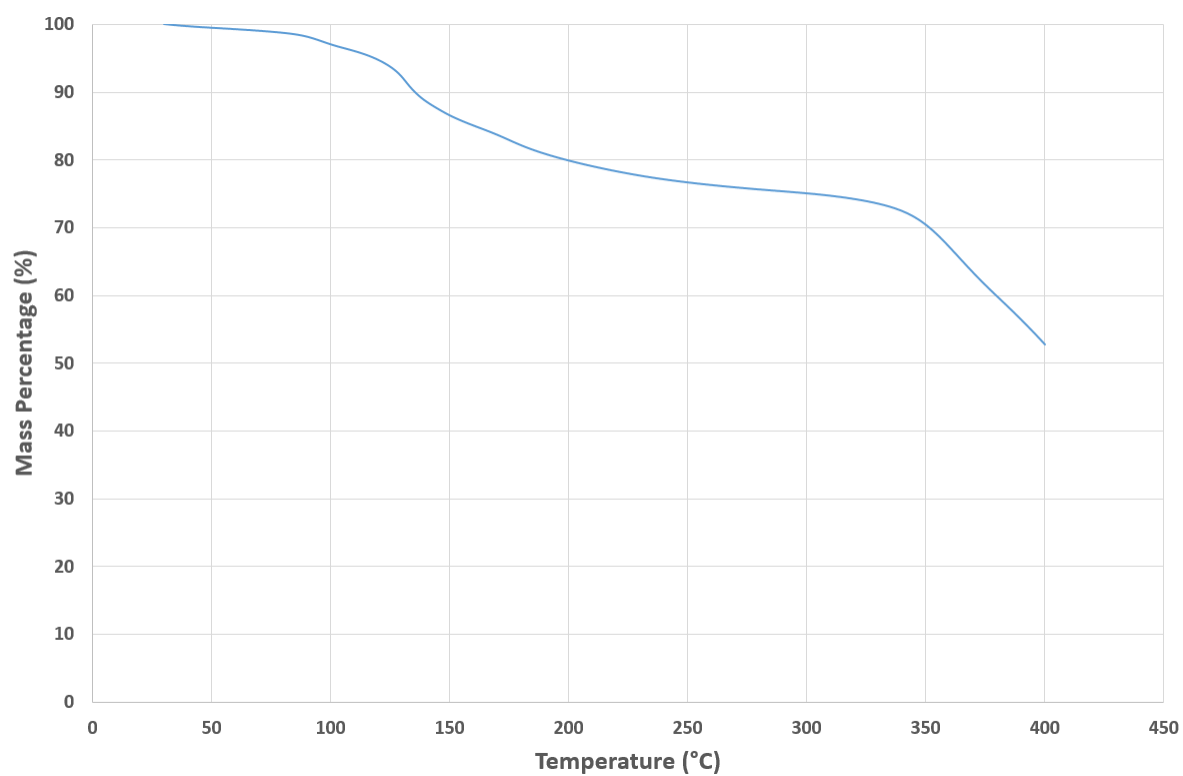

**Figure S11.** Thermogravimetric analysis of the as synthesised sample of **5·6DMF·4H<sub>2</sub>O**.

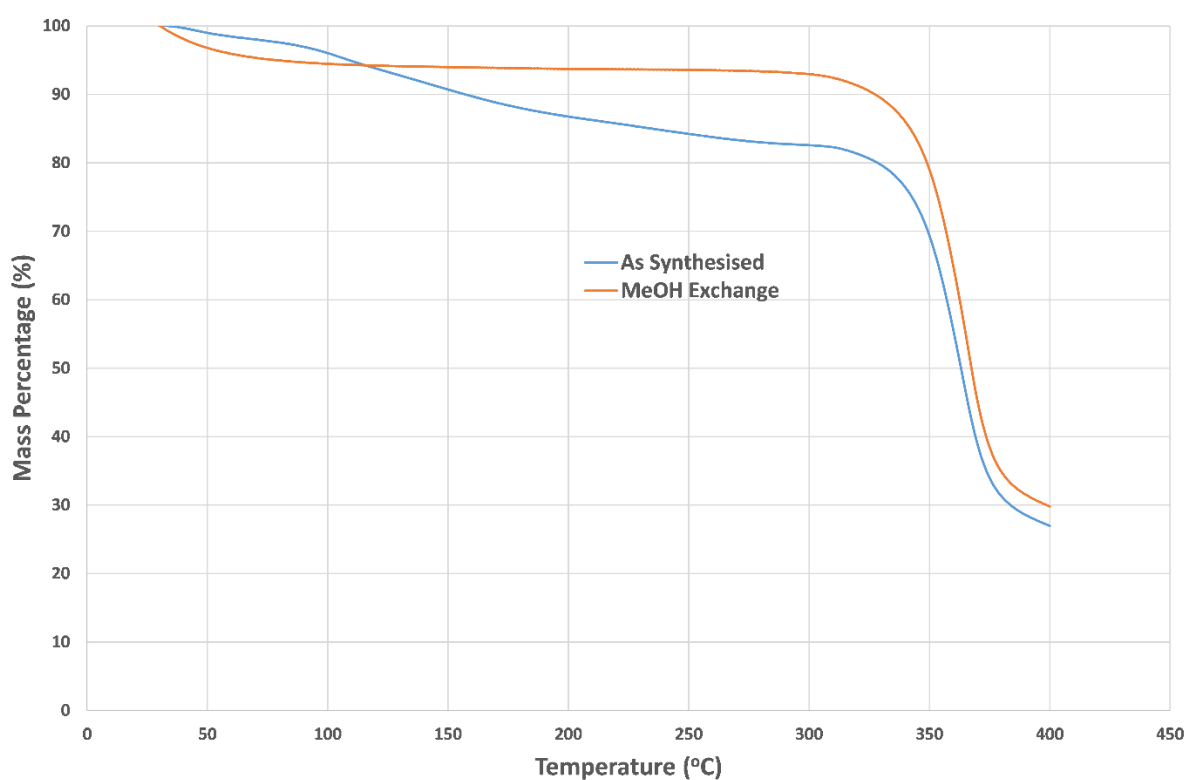

**Figure S12.** Thermogravimetric analysis of the as synthesised sample of **6·DMA·3H<sub>2</sub>O** (blue) and the methanol exchanged sample of **6** (orange).

## S4. Gas Adsorption Data

**Table S1.** Data for N<sub>2</sub> adsorption into **6** at 77 K with 10 second equilibration time up to 0.05 partial pressure, then to 40 second equilibration time for the rest of the isotherm

| Relative Pressure (P/P <sub>0</sub> ) | Absolute Pressure (mbar) | Quantity Adsorbed (cm <sup>3</sup> /g STP) | Elapsed Time (h:min) | Saturation Pressure (mbar) |
|---------------------------------------|--------------------------|--------------------------------------------|----------------------|----------------------------|
|                                       |                          |                                            | 03:33                | 993.2047647                |
| 0.007277787                           | 7.294000104              | 18.31318037                                | 12:15                | 1002.227788                |
| 0.012097171                           | 12.13142854              | 20.09557783                                | 14:26                | 1002.831905                |
| 0.028535188                           | 28.64917798              | 21.74413512                                | 15:42                | 1003.994733                |
| 0.063149211                           | 63.4120768               | 22.6816417                                 | 15:59                | 1004.162606                |
| 0.086837324                           | 87.41553031              | 28.79934215                                | 26:12                | 1006.658495                |
| 0.091192874                           | 91.8032727               | 29.07003024                                | 26:36                | 1006.693486                |
| 0.117317231                           | 118.1196571              | 29.59496488                                | 27:00                | 1006.839796                |
| 0.136356455                           | 137.3374719              | 29.91696033                                | 27:15                | 1007.194503                |
| 0.151669484                           | 152.7339754              | 30.15397379                                | 27:26                | 1007.018492                |
| 0.176026682                           | 177.2713919              | 30.43140582                                | 27:37                | 1007.071141                |
| 0.200984676                           | 202.4066191              | 30.66584635                                | 27:47                | 1007.074884                |
| 0.225990926                           | 227.5762876              | 30.88942678                                | 27:56                | 1007.015156                |
| 0.250888551                           | 252.6656607              | 31.07274403                                | 28:03                | 1007.083265                |
| 0.275853525                           | 277.7787136              | 31.24345211                                | 28:10                | 1006.979026                |
| 0.300669743                           | 302.7840279              | 31.40170323                                | 28:18                | 1007.031919                |
| 0.320768966                           | 323.0383687              | 31.54315603                                | 28:25                | 1007.074884                |
| 0.378804827                           | 381.5042772              | 31.73142776                                | 28:32                | 1007.12623                 |
| 0.437971536                           | 441.1254458              | 31.90771687                                | 28:39                | 1007.201176                |
| 0.498269641                           | 501.8689589              | 32.05630827                                | 28:46                | 1007.223635                |
| 0.577376684                           | 581.5717327              | 32.20332576                                | 28:53                | 1007.265705                |
| 0.618263029                           | 622.8235174              | 32.32715565                                | 29:00                | 1007.376291                |
| 0.6968622                             | 702.0225889              | 32.47498107                                | 29:07                | 1007.405179                |
| 0.756789414                           | 762.4547262              | 32.63058153                                | 29:14                | 1007.485983                |
| 0.816948247                           | 823.1600344              | 32.79988963                                | 29:21                | 1007.603649                |
| 0.857607032                           | 864.1629382              | 33.02385163                                | 29:28                | 1007.644417                |
| 0.897614344                           | 904.6762174              | 33.2982898                                 | 29:35                | 1007.867381                |
| 0.909764602                           | 917.0347416              | 33.47712405                                | 29:43                | 1007.991231                |
| 0.920198175                           | 927.570336               | 33.66860353                                | 29:50                | 1008.011493                |
| 0.930185246                           | 937.6661064              | 33.85249489                                | 29:57                | 1008.042334                |
| 0.939965978                           | 947.6276104              | 34.0683717                                 | 30:04                | 1008.150967                |
| 0.950026444                           | 957.8642384              | 34.31162806                                | 30:11                | 1008.25008                 |
| 0.95993049                            | 967.8773333              | 34.62492881                                | 30:18                | 1008.278561                |
| 0.969999409                           | 978.038528               | 35.0158412                                 | 30:25                | 1008.287756                |
| 0.979629184                           | 987.8465616              | 35.58382021                                | 30:32                | 1008.388253                |
| 0.988914722                           | 997.6616746              | 36.57140255                                | 30:40                | 1008.845002                |
| 0.994877849                           | 1003.378735              | 37.77099507                                | 30:49                | 1008.544653                |
| 0.998187441                           | 1006.856314              | 38.96283372                                | 31:00                | 1008.684615                |
| 0.980975097                           | 989.6723396              | 36.5446468                                 | 31:09                | 1008.865915                |
| 0.963319606                           | 971.890025               | 35.69311765                                | 31:16                | 1008.896756                |
| 0.942376594                           | 950.8690438              | 35.28542125                                | 31:23                | 1009.011737                |
| 0.921953666                           | 930.2493155              | 35.08848623                                | 31:30                | 1008.997903                |
| 0.901821494                           | 909.9012121              | 34.95840364                                | 31:37                | 1008.959332                |
| 0.881578179                           | 889.5031453              | 34.88538329                                | 31:45                | 1008.989522                |
| 0.861226381                           | 869.0639848              | 34.83729941                                | 31:52                | 1009.100515                |
| 0.822242579                           | 829.7562545              | 34.75022674                                | 31:59                | 1009.138028                |
| 0.782024825                           | 789.2253987              | 34.69920718                                | 32:06                | 1009.207603                |
| 0.703716663                           | 710.2709359              | 34.65554262                                | 32:13                | 1009.313795                |
| 0.604270429                           | 609.9708116              | 34.64259315                                | 32:20                | 1009.433496                |
| 0.561748867                           | 567.0816286              | 34.66515587                                | 32:27                | 1009.493143                |
| 0.48280971                            | 487.4284114              | 34.64646309                                | 32:34                | 1009.566297                |
| 0.460680676                           | 465.1021173              | 34.64545338                                | 32:41                | 1009.597626                |
| 0.36271848                            | 366.2111385              | 34.64028405                                | 32:49                | 1009.629118                |

|             |             |             |       |             |
|-------------|-------------|-------------|-------|-------------|
| 0.340538985 | 343.8297138 | 34.64153795 | 32:56 | 1009.663295 |
| 0.281412247 | 284.1368144 | 34.62097799 | 33:03 | 1009.681766 |
| 0.25053936  | 252.969835  | 34.60056354 | 33:10 | 1009.700971 |
| 0.200782295 | 202.7575424 | 34.53969456 | 33:17 | 1009.837759 |
| 0.150696535 | 152.1807066 | 34.42674129 | 33:24 | 1009.848745 |
| 0.100242586 | 101.2290337 | 34.23279591 | 33:35 | 1009.840608 |

**Table S2.** Data for N<sub>2</sub> adsorption into **6** at 77 K with 20 second equilibration time up to 0.15 partial pressure

| Relative Pressure (P/P <sub>0</sub> ) | Absolute Pressure (mbar) | Quantity Adsorbed (cm <sup>3</sup> /g STP) | Elapsed Time (h:min) | Saturation Pressure (mbar) |
|---------------------------------------|--------------------------|--------------------------------------------|----------------------|----------------------------|
|                                       |                          |                                            | 03:34                | 1009.514137                |
| 0.00828333                            | 8.314288825              | 23.11880494                                | 20:54                | 1003.73743                 |
| 0.007762647                           | 7.743572357              | 24.48438864                                | 26:44                | 997.5427879                |
| 0.013079508                           | 13.04066845              | 25.87307033                                | 28:54                | 997.0305415                |
| 0.016565448                           | 16.52312518              | 26.98353729                                | 31:19                | 997.4451396                |
| 0.017767947                           | 17.71997349              | 27.5093339                                 | 32:23                | 997.2999693                |
| 0.020926547                           | 20.85721316              | 28.19284777                                | 33:34                | 996.6868197                |
| 0.030926543                           | 30.80135287              | 28.96138556                                | 34:10                | 995.9520166                |
| 0.043878826                           | 43.69399269              | 29.67525467                                | 34:48                | 995.7876421                |
| 0.057436562                           | 57.16996886              | 30.16175972                                | 35:06                | 995.3584781                |
| 0.059896916                           | 59.61194797              | 30.32902835                                | 35:17                | 995.242358                 |
| 0.065350531                           | 65.03512282              | 30.52527316                                | 35:25                | 995.1735974                |
| 0.070155406                           | 69.81351921              | 30.69870854                                | 35:32                | 995.1267263                |
| 0.074968113                           | 74.5960809               | 30.87538316                                | 35:40                | 995.0374595                |
| 0.080005907                           | 79.61610075              | 31.05194143                                | 35:49                | 995.1277841                |
| 0.085130286                           | 84.6966981               | 31.21657041                                | 35:57                | 994.9067736                |
| 0.090210285                           | 89.77926876              | 31.34853534                                | 36:03                | 995.222096                 |
| 0.095324664                           | 94.86227681              | 31.48398392                                | 36:09                | 995.1493481                |
| 0.100346762                           | 99.8449818               | 31.62245318                                | 36:16                | 994.9995394                |
| 0.105443216                           | 104.8983699              | 31.74278963                                | 36:21                | 994.832805                 |
| 0.110478888                           | 109.9179473              | 31.84946488                                | 36:25                | 994.9226414                |
| 0.115469199                           | 114.8738905              | 31.96232847                                | 36:31                | 994.8444415                |
| 0.120457303                           | 119.8599013              | 32.06828608                                | 36:35                | 995.0405517                |
| 0.125513243                           | 124.896384               | 32.16669066                                | 36:39                | 995.0853071                |
| 0.130542304                           | 129.8951196              | 32.26093074                                | 36:44                | 995.0423419                |
| 0.135543638                           | 134.8716809              | 32.35023277                                | 36:48                | 995.0425046                |
| 0.140514725                           | 139.8407863              | 32.44214389                                | 36:52                | 995.203787                 |
| 0.145565968                           | 144.855105               | 32.53163139                                | 36:56                | 995.1165546                |
| 0.150613161                           | 149.8569124              | 32.61572354                                | 36:59                | 994.9788705                |

**Table S3.** Data for CO<sub>2</sub> adsorption into **6** at 273 K with 40 second equilibration time

| Relative Pressure (P/P <sub>0</sub> ) | Absolute Pressure (mbar) | Quantity Adsorbed (cm <sup>3</sup> /g STP) | Elapsed Time (h:min) | Saturation Pressure (mbar) |
|---------------------------------------|--------------------------|--------------------------------------------|----------------------|----------------------------|
|                                       |                          |                                            |                      | 34852.76851                |
| 5.13228E-05                           | 1.788742401              | 0.050540912                                | 04:22                |                            |
| 0.000108196                           | 3.770942436              | 0.128610871                                | 04:31                |                            |
| 0.00019691                            | 6.862862772              | 0.261701228                                | 04:43                |                            |
| 0.000402645                           | 14.03330479              | 0.58302699                                 | 05:12                |                            |
| 0.000896054                           | 31.22996508              | 1.374197029                                | 06:03                |                            |
| 0.001231911                           | 42.93552522              | 1.92458562                                 | 06:46                |                            |
| 0.001487584                           | 51.84642573              | 2.349014156                                | 07:21                |                            |
| 0.002402963                           | 83.74992719              | 3.742687993                                | 08:13                |                            |
| 0.002967159                           | 103.4136894              | 4.581793642                                | 08:45                |                            |
| 0.003479228                           | 121.2607365              | 5.327068703                                | 09:12                |                            |
| 0.003977533                           | 138.6280359              | 6.058779288                                | 09:40                |                            |
| 0.00448483                            | 156.308725               | 6.769066018                                | 10:02                |                            |
| 0.004977983                           | 173.496494               | 7.459099639                                | 10:24                |                            |
| 0.00593246                            | 206.7626461              | 8.749766963                                | 10:48                |                            |
| 0.006474679                           | 225.6604901              | 9.488313219                                | 11:07                |                            |
| 0.006982227                           | 243.3499574              | 10.17045823                                | 11:23                |                            |
| 0.00748057                            | 260.7185689              | 10.83746686                                | 11:40                |                            |
| 0.007984346                           | 278.2765772              | 11.48698483                                | 11:54                |                            |
| 0.008479364                           | 295.5293128              | 12.1220697                                 | 12:07                |                            |
| 0.008980924                           | 313.010057               | 12.76481667                                | 12:21                |                            |
| 0.009484241                           | 330.5520551              | 13.39446284                                | 12:33                |                            |
| 0.009983338                           | 347.9469706              | 14.0077223                                 | 12:45                |                            |
| 0.010482764                           | 365.3533394              | 14.61612552                                | 12:57                |                            |
| 0.010983871                           | 382.8182971              | 15.21322625                                | 13:08                |                            |
| 0.011938914                           | 416.104223               | 16.32829589                                | 13:21                |                            |
| 0.012481845                           | 435.0268656              | 16.95251228                                | 13:32                |                            |
| 0.01298445                            | 452.5440244              | 17.51320667                                | 13:42                |                            |
| 0.013485053                           | 469.9914461              | 18.05658359                                | 13:52                |                            |
| 0.013985719                           | 487.4410243              | 18.59077656                                | 14:01                |                            |
| 0.014487254                           | 504.9209141              | 19.1148964                                 | 14:11                |                            |
| 0.014984589                           | 522.2544128              | 19.6233504                                 | 14:20                |                            |
| 0.015932713                           | 555.2991476              | 20.64242529                                | 14:31                |                            |
| 0.016963136                           | 591.2122588              | 21.75402818                                | 14:41                |                            |
| 0.017961552                           | 626.0098202              | 22.81130131                                | 14:51                |                            |
| 0.018971165                           | 661.1976084              | 23.77854613                                | 15:01                |                            |
| 0.01995856                            | 695.6110867              | 24.69339457                                | 15:10                |                            |
| 0.020963821                           | 730.6471946              | 25.59041005                                | 15:20                |                            |
| 0.021963289                           | 765.4814148              | 26.45094558                                | 15:29                |                            |
| 0.022964855                           | 800.3887898              | 27.27796768                                | 15:39                |                            |
| 0.023965362                           | 835.2592212              | 28.06554664                                | 15:47                |                            |
| 0.024966541                           | 870.1530882              | 28.82760677                                | 15:56                |                            |
| 0.025968914                           | 905.0885371              | 29.55999677                                | 16:05                |                            |
| 0.026968311                           | 939.920316               | 30.26378307                                | 16:13                |                            |
| 0.0279671                             | 974.7308565              | 30.94145078                                | 16:22                |                            |
| 0.028970252                           | 1009.693484              | 31.59398154                                | 16:31                |                            |
| 0.029970042                           | 1044.538934              | 32.22559577                                | 16:39                |                            |
| 0.000927306                           | 32.31916764              | 1.642435157                                | 21:16                |                            |

### S5. Partial Pressure vs. Quantity Adsorbed

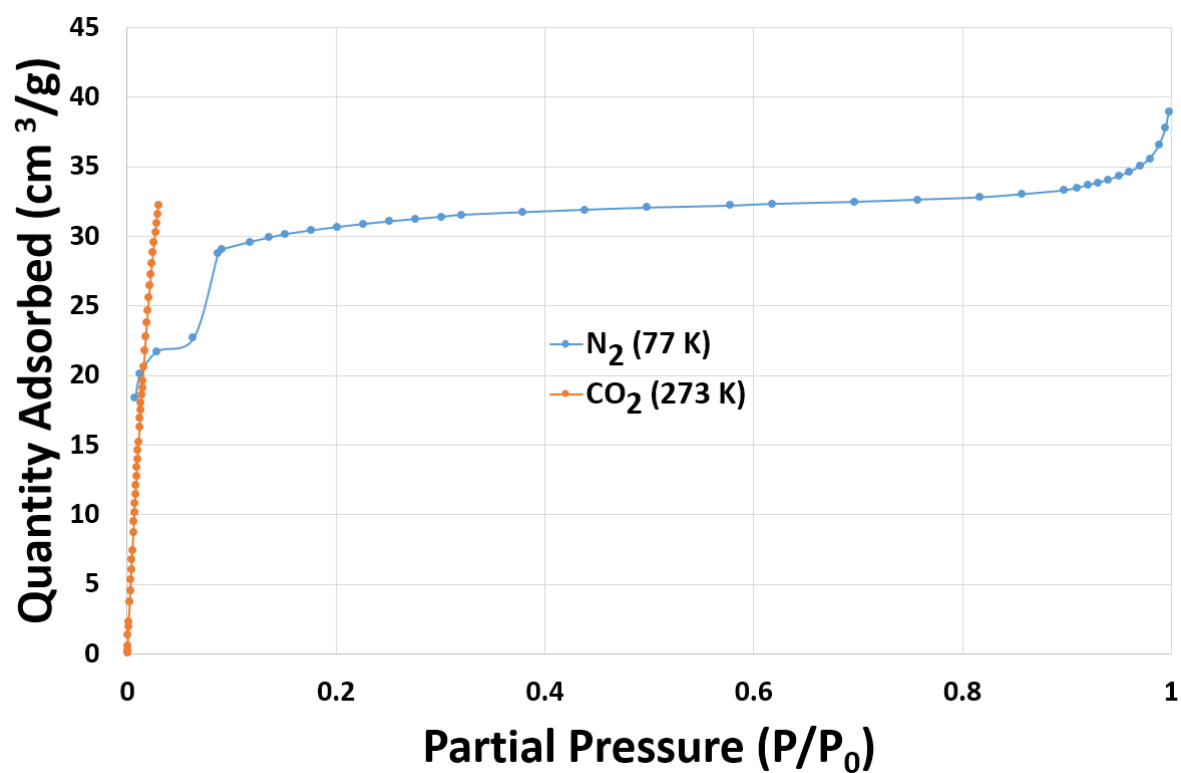

**Figure S13.** The quantity of N<sub>2</sub> (blue) and CO<sub>2</sub> (orange) adsorbed by **6** vs. partial pressure, demonstrating similar uptake between the two gasses at equivalent partial pressures.

**S6. Catenane Motif Present Within poly-[Co<sub>4</sub>(P4pxy)<sub>2</sub>(DMF)<sub>2</sub>(μ-OH<sub>2</sub>)<sub>2</sub>(OH<sub>2</sub>)<sub>2</sub>]  
(5)**

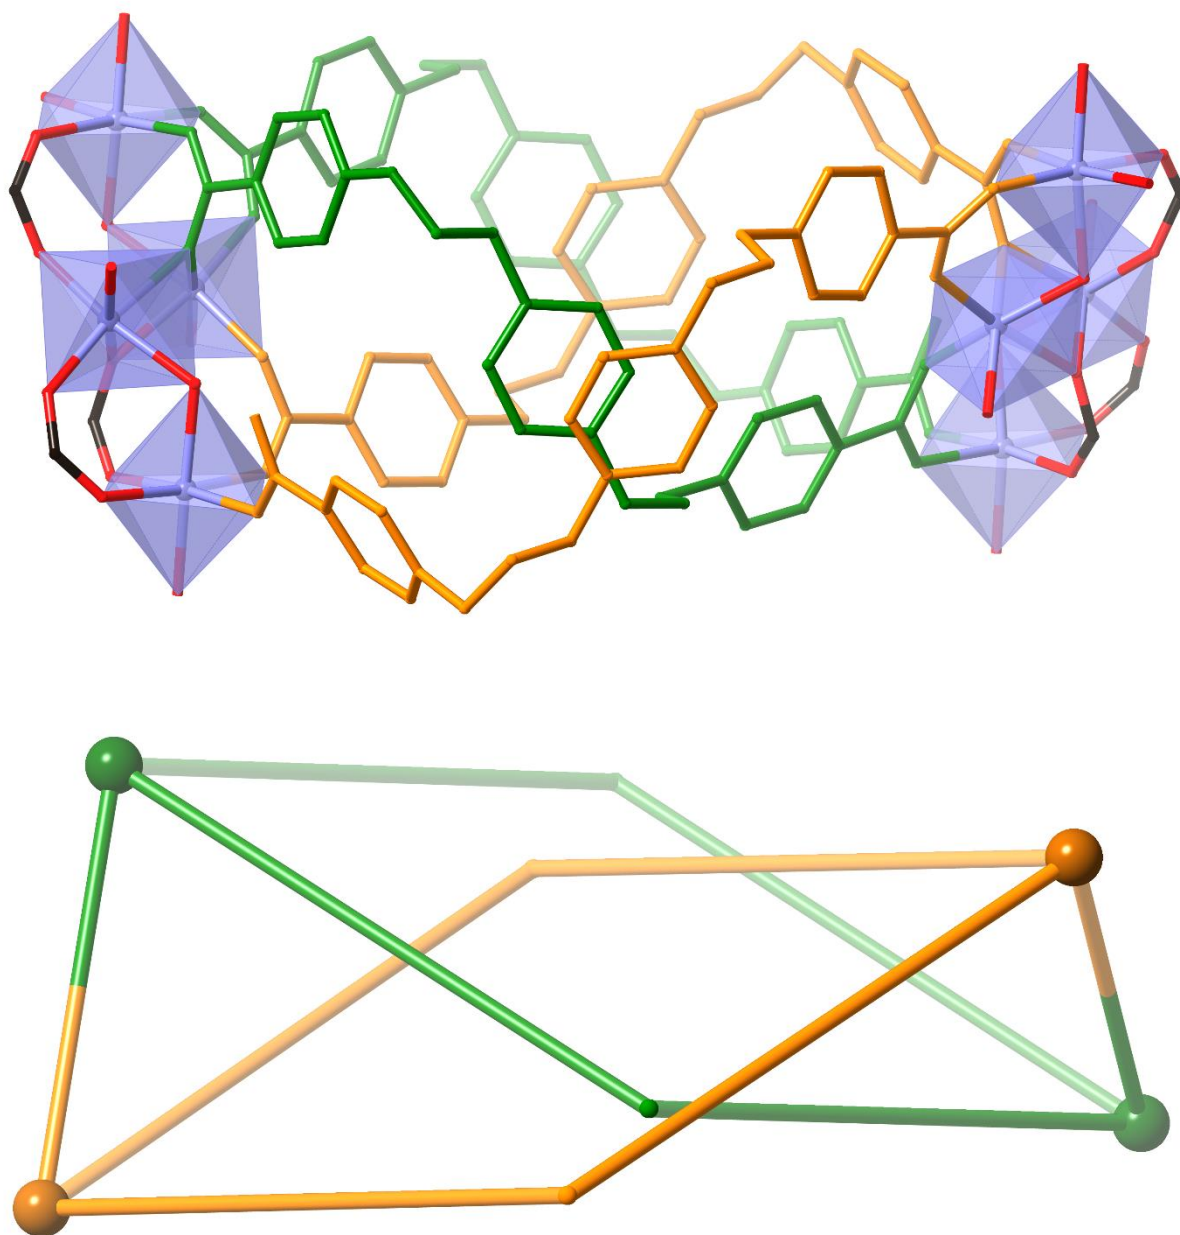

**Figure S14.** *Top:* The self-penetrating motif present within the structure of **5**, which share the same set of metal nodes. *Bottom:* A schematic representation of the catenane motif.

## *References*

1. A. L. Spek, *Acta Crystallogr., Sect. C: Cryst. Struct. Commun.*, 2015, **71**, 9-18.
